# Supplementary material
Source: PubMed Central journal article supplement (PMC4865555)
Supplement: jcsm.12.5.689s1.pdf [file jcsm.12.5.689s1.pdf]

**Table S1.** Polysomnography data of patients with rapid eye movement sleep behavior disorder before and after ramelteon treatment

| Patient No. | Before or After | AHI      | TST (min) | SE (%) | SOL (min) | WASO (%) | NREM 1 (%) | NREM 2 (%) | NREM 3 (%) | Stage R (%) | REM Latency (min) | RWA (%) | Phasic EMG (%) | Tonic EMG (%) |
|-------------|-----------------|----------|-----------|--------|-----------|----------|------------|------------|------------|-------------|-------------------|---------|----------------|---------------|
| 1           | Before          | 11.4     | 358       | 80.1   | 28.5      | 14       | 47.3       | 31.3       | 0          | 21.4        | 28.5              | 0       | 30.07          | 30.1          |
|             | After           | 3.3      | 323.5     | 70.2   | 19        | 21.9     | 27.2       | 43.1       | 0          | 29.7        | 136               | 6.25    | 51.04          | 57.3          |
| 2           | Before          | 5.6      | 396.5     | 84.7   | 7.5       | 13.9     | 13         | 61.9       | 0          | 25.1        | 64                | 6.46    | 2.48           | 9             |
|             | after           | 0.9      | 336       | 70.1   | 9         | 28.5     | 43.8       | 42.9       | 0          | 13.4        | 132               | 15.6    | 8.9            | 24.4          |
| 3           | Before          | 7.8      | 354       | 78.1   | 4         | 19.4     | 22.5       | 64.1       | 0          | 13.4        | 70.5              | 26.3    | 23.2           | 49.5          |
|             | After           | 1        | 308.5     | 68.4   | 12.5      | 29.6     | 25.8       | 52.4       | 0          | 21.9        | 174               | 12.6    | 33.3           | 45.9          |
| 4           | Before          | 17.6     | 337       | 71.6   | 19.5      | 25.3     | 17.1       | 65.9       | 0          | 17.1        | 148               | 6.1     | 13.9           | 20            |
|             | After           | 8.3      | 353       | 72.2   | 13        | 25.8     | 24.4       | 46.7       | 0          | 28.9        | 78                | 13.7    | 13.7           | 27.5          |
| 5           | Before          | 13.8     | 122       | 22.9   | 3         | 74.7     | 34.8       | 53.7       | 0          | 11.5        | 181               | 14.3    | 7.1            | 21.4          |
|             | After           | DO       | DO        | DO     | DO        | DO       | DO         | DO         | DO         | DO          | DO                | DO      | DO             | DO            |
| 6           | Before          | 5.2      | 335       | 67.3   | 8         | 31.4     | 49.1       | 36.6       | 0          | 14.3        | 70.5              | 21.9    | 70.8           | 92.7          |
|             | After           | ※1, 0    | 368.5     | 80     | 4.5       | 19.1     | 33.9       | 55.1       | 0          | 11          | 61                | 9.9     | 59.3           | 69.1          |
| 7           | Before          | 46.7     | 223.5     | 41     | 63.5      | 53.5     | 46.5       | 46.1       | 0          | 7.4         | 256               | 6.1     | 9.1            | 15.2          |
|             | After           | ※2, 2.2  | 302.5     | 65.3   | 51        | 25.9     | 30.2       | 43.8       | 0          | 26          | 220               | 25.5    | 5.7            | 31.2          |
| 8           | Before          | 31.1     | 322       | 68.5   | 31.5      | 26.6     | 51.2       | 36         | 0          | 12.7        | 227.5             | 2.4     | 0              | 2.4           |
|             | After           | 34.2     | 277       | 60.9   | 44        | 31.5     | 70.2       | 20.6       | 0          | 9.2         | 316               | 14      | 2              | 16            |
| 9           | Before          | 28.2     | 315       | 64.4   | 119       | 14.9     | 15.7       | 68.4       | 0          | 15.9        | 201.5             | 13      | 0              | 13            |
|             | After           | ※2, 12.8 | 243.5     | 48.4   | 14        | 50.2     | 28.3       | 67.6       | 0          | 4.1         | 192.5             | 5       | 0              | 5             |
| 10          | Before          | 3.1      | 390       | 78.6   | 54        | 11.7     | 6.5        | 67.3       | 0          | 26.2        | 233               | 27.5    | 59.8           | 87.3          |
|             | After           | 0.8      | 383.5     | 86.6   | 2.5       | 12.9     | 9.6        | 72.4       | 0.3        | 17.7        | 166               | 42.6    | 39.7           | 82.4          |
| 11          | Before          | 6.4      | 366.5     | 78     | 22        | 12.8     | 26.6       | 61         | 0          | 12.4        | 208               | 22      | 0              | 22            |
|             | After           | DO       | DO        | DO     | DO        | DO       | DO         | DO         | DO         | DO          | DO                | DO      | DO             | DO            |
| 12          | Before          | 26       | 399       | 84.9   | 4         | 14.4     | 12.5       | 79.9       | 1.3        | 6.3         | 227               | 28      | 8              | 36            |
|             | After           | ※2, 2    | 430.5     | 92     | 5.5       | 6.9      | 10.8       | 81.1       | 0.9        | 7.2         | 79.5              | 38.7    | 12.9           | 51.6          |

AHI, apnea-hypopnea index; DO = dropout; EMG = electromyography; NREM = nonrapid eye movement sleep; RBDSS, rapid eye movement sleep behavior disorder severity scale; RWA = REM sleep without atonia; SE = sleep efficiency; SOL = sleep onset latency; TST = total sleep time; ; VAS = visual analog scale-family ratings of dream enactment behavior frequency and severity; WASO = wake after sleep onset. ※1, after intraoral device treatment; ※2, after nasal continuous positive airway pressure treatment.
